# Supplementary material for: Integration of Residue Attributes for Sequence Diversity Characterization of Terpenoid Enzymes
Source: Hindawi journal article supplement (doi:10.1155/2014/753428), 2014-01-01
Supplement: f1 [file 753428.f1.zip]

### Additional file 1

Each entry in the amino acid index has information organized as:

H Accession number

D Data description

R LITDB entry number

A Author(s)

T Title of the article

J Journal reference

C Accession numbers of similar entries with the correlation coefficients of 0.8 (-0.8) or more (less).

I Amino acid index data in the following order

Ala Arg Asn Asp Cys Gln Glu Gly His Ile  
Leu Lys Met Phe Pro Ser Thr Trp Tyr Val

// Index separator symbol

An example amino acid index is shown below.

H ANDN920101

D alpha-CH chemical shifts (Andersen et al., 1992)

R LIT:1810048b PMID:1575719

A Andersen, N.H., Cao, B. and Chen, C.

T Peptide/protein structure analysis using the chemical shift index  
method: upfield alpha-CH values reveal dynamic helices and aL sites

J Biochem. and Biophys. Res. Comm. 184, 1008-1014 (1992)

C BUNA790102 0.949

|   |      |      |      |      |      |      |      |      |      |      |
|---|------|------|------|------|------|------|------|------|------|------|
| I | A/L  | R/K  | N/M  | D/F  | C/P  | Q/S  | E/T  | G/W  | H/Y  | I/V  |
|   | 4.35 | 4.38 | 4.75 | 4.76 | 4.65 | 4.37 | 4.29 | 3.97 | 4.63 | 3.95 |
|   | 4.17 | 4.36 | 4.52 | 4.66 | 4.44 | 4.50 | 4.35 | 4.70 | 4.60 | 3.95 |

//

Figure 1: A sample entry in the AAindex database
