# Supplementary material for: Integration of Residue Attributes for Sequence Diversity Characterization of Terpenoid Enzymes
Source: Biomed Res Int. 2014 May 11;2014:753428. doi: 10.1155/2014/753428 (PMC4034505; doi:10.1155/2014/753428)
Supplement: Supplementary file 1 — The supplementary figure 1 depicts the procedure carried out on this report. The starting point was the amino acid index database, which was reduced to a small subset based on variable importance scores (VIM) derived by random forest feature selection. The reduced set (rAAindex) was further used to encode biochemical and physical properties into protein sequences and subsequently for examination of the data structure of the sub-families terpene synthase sequences. Also included with the supplementary materials are: the amino acid index, the list of 544 properties in the amino acid index and a short documentation of the amino acid index data and format. [file 753428.f1.zip › amino_acid_index_documentation.txt]

AAindex: Amino Acid Index Database

Introduction
============

An amino acid index is a set of 20 numerical values representing any of the different physicochemical and biological properties of amino acids.  The AAindex section of the Amino Acid Index Database is a collection of published indices. 


(Data Format of AAindex1)
************************************************************************
*                                                                      *
* Each entry has the following format.                                 *
*                                                                      *
* H Accession number                                                   *
* D Data description                                                   *
* R LITDB entry number                                                 *
* A Author(s)                                                          *
* T Title of the article                                               *
* J Journal reference                                                  *
* * Comment or missing                                                 *
* C Accession numbers of similar entries with the correlation          *
*   coefficients of 0.8 (-0.8) or more (less).                         *
*   Notice: The correlation coefficient is calculated with zeros       *
*   filled for missing values.                                         *
* I Amino acid index data in the following order                       *
*   Ala    Arg    Asn    Asp    Cys    Gln    Glu    Gly    His    Ile *
*   Leu    Lys    Met    Phe    Pro    Ser    Thr    Trp    Tyr    Val *
* //                                                                   *
************************************************************************

(Data Format of AAindex2)
************************************************************************
*                                                                      *
* Each entry has the following format.                                 *
*                                                                      *
* H Accession number                                                   *
* D Data description                                                   *
* R LITDB entry number                                                 *
* A Author(s)                                                          *
* T Title of the article                                               *
* J Journal reference                                                  *
* * Comment or missing                                                 *
* M rows = ARNDCQEGHILKMFPSTWYV, cols = ARNDCQEGHILKMFPSTWYV           *
*   AA                                                                 *
*   AR RR                                                              *
*   AN RN NN                                                           *
*   AD RD ND DD                                                        *
*   AC RC NC DC CC                                                     *
*   AQ RQ NQ DQ CQ QQ                                                  *
*   AE RE NE DE CE QE EE                                               *
*   AG RG NG DG CG QG EG GG                                            *
*   AH RH NH DH CH QH EH GH HH                                         *
*   AI RI NI DI CI QI EI GI HI II                                      *
*   AL RL NL DL CL QL EL GL HL IL LL                                   *
*   AK RK NK DK CK QK EK GK HK IK LK KK                                *
*   AM RM NM DM CM QM EM GM HM IM LM KM MM                             *
*   AF RF NF DF CF QF EF GF HF IF LF KF MF FF                          *
*   AP RP NP DP CP QP EP GP HP IP LP KP MP FP PP                       *
*   AS RS NS DS CS QS ES GS HS IS LS KS MS FS PS SS                    *
*   AT RT NT DT CT QT ET GT HT IT LT KT MT FT PT ST TT                 *
*   AW RW NW DW CW QW EW GW HW IW LW KW MW FW PW SW TW WW              *
*   AY RY NY DY CY QY EY GY HY IY LY KY MY FY PY SY TY WY YY           *
*   AV RV NV DV CV QV EV GV HV IV LV KV MV FV PV SV TV WV YV VV        *
* //                                                                   *
************************************************************************
