# Supplementary material for: Integration of Residue Attributes for Sequence Diversity Characterization of Terpenoid Enzymes
Source: Biomed Res Int. 2014 May 11;2014:753428. doi: 10.1155/2014/753428 (PMC4034505; doi:10.1155/2014/753428)
Supplement: Supplementary file 1 — The supplementary figure 1 depicts the procedure carried out on this report. The starting point was the amino acid index database, which was reduced to a small subset based on variable importance scores (VIM) derived by random forest feature selection. The reduced set (rAAindex) was further used to encode biochemical and physical properties into protein sequences and subsequently for examination of the data structure of the sub-families terpene synthase sequences. Also included with the supplementary materials are: the amino acid index, the list of 544 properties in the amino acid index and a short documentation of the amino acid index data and format. [file 753428.f1.zip › List_of_amino_acid_indices.txt]

List of 544 Amino Acid Indices in AAindex ver.9.1

The columns correspond to the AAindex accession number and the description of
each index.

ANDN920101 alpha-CH chemical shifts (Andersen et al., 1992)
ARGP820101 Hydrophobicity index (Argos et al., 1982)
ARGP820102 Signal sequence helical potential (Argos et al., 1982)
ARGP820103 Membrane-buried preference parameters (Argos et al., 1982)
BEGF750101 Conformational parameter of inner helix (Beghin-Dirkx, 1975)
BEGF750102 Conformational parameter of beta-structure (Beghin-Dirkx, 1975)
BEGF750103 Conformational parameter of beta-turn (Beghin-Dirkx, 1975)
BHAR880101 Average flexibility indices (Bhaskaran-Ponnuswamy, 1988)
BIGC670101 Residue volume (Bigelow, 1967)
BIOV880101 Information value for accessibility; average fraction 35% (Biou et al., 1988)
BIOV880102 Information value for accessibility; average fraction 23% (Biou et al., 1988)
BROC820101 Retention coefficient in TFA (Browne et al., 1982)
BROC820102 Retention coefficient in HFBA (Browne et al., 1982)
BULH740101 Transfer free energy to surface (Bull-Breese, 1974)
BULH740102 Apparent partial specific volume (Bull-Breese, 1974)
BUNA790101 alpha-NH chemical shifts (Bundi-Wuthrich, 1979)
BUNA790102 alpha-CH chemical shifts (Bundi-Wuthrich, 1979)
BUNA790103 Spin-spin coupling constants 3JHalpha-NH (Bundi-Wuthrich, 1979)
BURA740101 Normalized frequency of alpha-helix (Burgess et al., 1974)
BURA740102 Normalized frequency of extended structure (Burgess et al., 1974)
CHAM810101 Steric parameter (Charton, 1981)
CHAM820101 Polarizability parameter (Charton-Charton, 1982)
CHAM820102 Free energy of solution in water, kcal/mole (Charton-Charton, 1982)
CHAM830101 The Chou-Fasman parameter of the coil conformation (Charton-Charton, 1983)
CHAM830102 A parameter defined from the residuals obtained from the best correlation of  the Chou-Fasman parameter of beta-sheet (Charton-Charton, 1983)
CHAM830103 The number of atoms in the side chain labelled 1+1 (Charton-Charton, 1983)
CHAM830104 The number of atoms in the side chain labelled 2+1 (Charton-Charton, 1983)
CHAM830105 The number of atoms in the side chain labelled 3+1 (Charton-Charton, 1983)
CHAM830106 The number of bonds in the longest chain (Charton-Charton, 1983)
CHAM830107 A parameter of charge transfer capability (Charton-Charton, 1983)
CHAM830108 A parameter of charge transfer donor capability (Charton-Charton, 1983)
CHOC750101 Average volume of buried residue (Chothia, 1975)
CHOC760101 Residue accessible surface area in tripeptide (Chothia, 1976)
CHOC760102 Residue accessible surface area in folded protein (Chothia, 1976)
CHOC760103 Proportion of residues 95% buried (Chothia, 1976)
CHOC760104 Proportion of residues 100% buried (Chothia, 1976)
CHOP780101 Normalized frequency of beta-turn (Chou-Fasman, 1978a)
CHOP780201 Normalized frequency of alpha-helix (Chou-Fasman, 1978b)
CHOP780202 Normalized frequency of beta-sheet (Chou-Fasman, 1978b)
CHOP780203 Normalized frequency of beta-turn (Chou-Fasman, 1978b)
CHOP780204 Normalized frequency of N-terminal helix (Chou-Fasman, 1978b)
CHOP780205 Normalized frequency of C-terminal helix (Chou-Fasman, 1978b)
CHOP780206 Normalized frequency of N-terminal non helical region (Chou-Fasman, 1978b)
CHOP780207 Normalized frequency of C-terminal non helical region (Chou-Fasman, 1978b)
CHOP780208 Normalized frequency of N-terminal beta-sheet (Chou-Fasman, 1978b)
CHOP780209 Normalized frequency of C-terminal beta-sheet (Chou-Fasman, 1978b)
CHOP780210 Normalized frequency of N-terminal non beta region (Chou-Fasman, 1978b)
CHOP780211 Normalized frequency of C-terminal non beta region (Chou-Fasman, 1978b)
CHOP780212 Frequency of the 1st residue in turn (Chou-Fasman, 1978b)
CHOP780213 Frequency of the 2nd residue in turn (Chou-Fasman, 1978b)
CHOP780214 Frequency of the 3rd residue in turn (Chou-Fasman, 1978b)
CHOP780215 Frequency of the 4th residue in turn (Chou-Fasman, 1978b)
CHOP780216 Normalized frequency of the 2nd and 3rd residues in turn (Chou-Fasman, 1978b)
CIDH920101 Normalized hydrophobicity scales for alpha-proteins (Cid et al., 1992)
CIDH920102 Normalized hydrophobicity scales for beta-proteins (Cid et al., 1992)
CIDH920103 Normalized hydrophobicity scales for alpha+beta-proteins (Cid et al., 1992)
CIDH920104 Normalized hydrophobicity scales for alpha/beta-proteins (Cid et al., 1992)
CIDH920105 Normalized average hydrophobicity scales (Cid et al., 1992)
COHE430101 Partial specific volume (Cohn-Edsall, 1943)
CRAJ730101 Normalized frequency of middle helix (Crawford et al., 1973)
CRAJ730102 Normalized frequency of beta-sheet (Crawford et al., 1973)
CRAJ730103 Normalized frequency of turn (Crawford et al., 1973)
DAWD720101 Size (Dawson, 1972)
DAYM780101 Amino acid composition (Dayhoff et al., 1978a)
DAYM780201 Relative mutability (Dayhoff et al., 1978b)
DESM900101 Membrane preference for cytochrome b: MPH89 (Degli Esposti et al., 1990)
DESM900102 Average membrane preference: AMP07 (Degli Esposti et al., 1990)
EISD840101 Consensus normalized hydrophobicity scale (Eisenberg, 1984)
EISD860101 Solvation free energy (Eisenberg-McLachlan, 1986)
EISD860102 Atom-based hydrophobic moment (Eisenberg-McLachlan, 1986)
EISD860103 Direction of hydrophobic moment (Eisenberg-McLachlan, 1986)
FASG760101 Molecular weight (Fasman, 1976)
FASG760102 Melting point (Fasman, 1976)
FASG760103 Optical rotation (Fasman, 1976)
FASG760104 pK-N (Fasman, 1976)
FASG760105 pK-C (Fasman, 1976)
FAUJ830101 Hydrophobic parameter pi (Fauchere-Pliska, 1983)
FAUJ880101 Graph shape index (Fauchere et al., 1988)
FAUJ880102 Smoothed upsilon steric parameter (Fauchere et al., 1988)
FAUJ880103 Normalized van der Waals volume (Fauchere et al., 1988)
FAUJ880104 STERIMOL length of the side chain (Fauchere et al., 1988)
FAUJ880105 STERIMOL minimum width of the side chain (Fauchere et al., 1988)
FAUJ880106 STERIMOL maximum width of the side chain (Fauchere et al., 1988)
FAUJ880107 N.m.r. chemical shift of alpha-carbon (Fauchere et al., 1988)
FAUJ880108 Localized electrical effect (Fauchere et al., 1988)
FAUJ880109 Number of hydrogen bond donors (Fauchere et al., 1988)
FAUJ880110 Number of full nonbonding orbitals (Fauchere et al., 1988)
FAUJ880111 Positive charge (Fauchere et al., 1988)
FAUJ880112 Negative charge (Fauchere et al., 1988)
FAUJ880113 pK-a(RCOOH) (Fauchere et al., 1988)
FINA770101 Helix-coil equilibrium constant (Finkelstein-Ptitsyn, 1977)
FINA910101 Helix initiation parameter at posision i-1 (Finkelstein et al., 1991)
FINA910102 Helix initiation parameter at posision i,i+1,i+2 (Finkelstein et al., 1991)
FINA910103 Helix termination parameter at posision j-2,j-1,j (Finkelstein et al., 1991)
FINA910104 Helix termination parameter at posision j+1 (Finkelstein et al., 1991)
GARJ730101 Partition coefficient (Garel et al., 1973)
GEIM800101 Alpha-helix indices (Geisow-Roberts, 1980)
GEIM800102 Alpha-helix indices for alpha-proteins (Geisow-Roberts, 1980)
GEIM800103 Alpha-helix indices for beta-proteins (Geisow-Roberts, 1980)
GEIM800104 Alpha-helix indices for alpha/beta-proteins (Geisow-Roberts, 1980)
GEIM800105 Beta-strand indices (Geisow-Roberts, 1980)
GEIM800106 Beta-strand indices for beta-proteins (Geisow-Roberts, 1980)
GEIM800107 Beta-strand indices for alpha/beta-proteins (Geisow-Roberts, 1980)
GEIM800108 Aperiodic indices (Geisow-Roberts, 1980)
GEIM800109 Aperiodic indices for alpha-proteins (Geisow-Roberts, 1980)
GEIM800110 Aperiodic indices for beta-proteins (Geisow-Roberts, 1980)
GEIM800111 Aperiodic indices for alpha/beta-proteins (Geisow-Roberts, 1980)
GOLD730101 Hydrophobicity factor (Goldsack-Chalifoux, 1973)
GOLD730102 Residue volume (Goldsack-Chalifoux, 1973)
GRAR740101 Composition (Grantham, 1974)
GRAR740102 Polarity (Grantham, 1974)
GRAR740103 Volume (Grantham, 1974)
GUYH850101 Partition energy (Guy, 1985)
HOPA770101 Hydration number (Hopfinger, 1971), Cited by Charton-Charton (1982)
HOPT810101 Hydrophilicity value (Hopp-Woods, 1981)
HUTJ700101 Heat capacity (Hutchens, 1970)
HUTJ700102 Absolute entropy (Hutchens, 1970)
HUTJ700103 Entropy of formation (Hutchens, 1970)
ISOY800101 Normalized relative frequency of alpha-helix (Isogai et al., 1980)
ISOY800102 Normalized relative frequency of extended structure (Isogai et al., 1980)
ISOY800103 Normalized relative frequency of bend (Isogai et al., 1980)
ISOY800104 Normalized relative frequency of bend R (Isogai et al., 1980)
ISOY800105 Normalized relative frequency of bend S (Isogai et al., 1980)
ISOY800106 Normalized relative frequency of helix end (Isogai et al., 1980)
ISOY800107 Normalized relative frequency of double bend (Isogai et al., 1980)
ISOY800108 Normalized relative frequency of coil (Isogai et al., 1980)
JANJ780101 Average accessible surface area (Janin et al., 1978)
JANJ780102 Percentage of buried residues (Janin et al., 1978)
JANJ780103 Percentage of exposed residues (Janin et al., 1978)
JANJ790101 Ratio of buried and accessible molar fractions (Janin, 1979)
JANJ790102 Transfer free energy (Janin, 1979)
JOND750101 Hydrophobicity (Jones, 1975)
JOND750102 pK (-COOH) (Jones, 1975)
JOND920101 Relative frequency of occurrence (Jones et al., 1992)
JOND920102 Relative mutability (Jones et al., 1992)
JUKT750101 Amino acid distribution (Jukes et al., 1975)
JUNJ780101 Sequence frequency (Jungck, 1978)
KANM800101 Average relative probability of helix (Kanehisa-Tsong, 1980)
KANM800102 Average relative probability of beta-sheet (Kanehisa-Tsong, 1980)
KANM800103 Average relative probability of inner helix (Kanehisa-Tsong, 1980)
KANM800104 Average relative probability of inner beta-sheet (Kanehisa-Tsong, 1980)
KARP850101 Flexibility parameter for no rigid neighbors (Karplus-Schulz, 1985)
KARP850102 Flexibility parameter for one rigid neighbor (Karplus-Schulz, 1985)
KARP850103 Flexibility parameter for two rigid neighbors (Karplus-Schulz, 1985)
KHAG800101 The Kerr-constant increments (Khanarian-Moore, 1980)
KLEP840101 Net charge (Klein et al., 1984)
KRIW710101 Side chain interaction parameter (Krigbaum-Rubin, 1971)
KRIW790101 Side chain interaction parameter (Krigbaum-Komoriya, 1979)
KRIW790102 Fraction of site occupied by water (Krigbaum-Komoriya, 1979)
KRIW790103 Side chain volume (Krigbaum-Komoriya, 1979)
KYTJ820101 Hydropathy index (Kyte-Doolittle, 1982)
LAWE840101 Transfer free energy, CHP/water (Lawson et al., 1984)
LEVM760101 Hydrophobic parameter (Levitt, 1976)
LEVM760102 Distance between C-alpha and centroid of side chain (Levitt, 1976)
LEVM760103 Side chain angle theta(AAR) (Levitt, 1976)
LEVM760104 Side chain torsion angle phi(AAAR) (Levitt, 1976)
LEVM760105 Radius of gyration of side chain (Levitt, 1976)
LEVM760106 van der Waals parameter R0 (Levitt, 1976)
LEVM760107 van der Waals parameter epsilon (Levitt, 1976)
LEVM780101 Normalized frequency of alpha-helix, with weights (Levitt, 1978)
LEVM780102 Normalized frequency of beta-sheet, with weights (Levitt, 1978)
LEVM780103 Normalized frequency of reverse turn, with weights (Levitt, 1978)
LEVM780104 Normalized frequency of alpha-helix, unweighted (Levitt, 1978)
LEVM780105 Normalized frequency of beta-sheet, unweighted (Levitt, 1978)
LEVM780106 Normalized frequency of reverse turn, unweighted (Levitt, 1978)
LEWP710101 Frequency of occurrence in beta-bends (Lewis et al., 1971)
LIFS790101 Conformational preference for all beta-strands (Lifson-Sander, 1979)
LIFS790102 Conformational preference for parallel beta-strands (Lifson-Sander, 1979)
LIFS790103 Conformational preference for antiparallel beta-strands (Lifson-Sander, 1979)
MANP780101 Average surrounding hydrophobicity (Manavalan-Ponnuswamy, 1978)
MAXF760101 Normalized frequency of alpha-helix (Maxfield-Scheraga, 1976)
MAXF760102 Normalized frequency of extended structure (Maxfield-Scheraga, 1976)
MAXF760103 Normalized frequency of zeta R (Maxfield-Scheraga, 1976)
MAXF760104 Normalized frequency of left-handed alpha-helix (Maxfield-Scheraga, 1976)
MAXF760105 Normalized frequency of zeta L (Maxfield-Scheraga, 1976)
MAXF760106 Normalized frequency of alpha region (Maxfield-Scheraga, 1976)
MCMT640101 Refractivity (McMeekin et al., 1964), Cited by Jones (1975)
MEEJ800101 Retention coefficient in HPLC, pH7.4 (Meek, 1980)
MEEJ800102 Retention coefficient in HPLC, pH2.1 (Meek, 1980)
MEEJ810101 Retention coefficient in NaClO4 (Meek-Rossetti, 1981)
MEEJ810102 Retention coefficient in NaH2PO4 (Meek-Rossetti, 1981)
MEIH800101 Average reduced distance for C-alpha (Meirovitch et al., 1980)
MEIH800102 Average reduced distance for side chain (Meirovitch et al., 1980)
MEIH800103 Average side chain orientation angle (Meirovitch et al., 1980)
MIYS850101 Effective partition energy (Miyazawa-Jernigan, 1985)
NAGK730101 Normalized frequency of alpha-helix (Nagano, 1973)
NAGK730102 Normalized frequency of bata-structure (Nagano, 1973)
NAGK730103 Normalized frequency of coil (Nagano, 1973)
NAKH900101 AA composition of total proteins (Nakashima et al., 1990)
NAKH900102 SD of AA composition of total proteins (Nakashima et al., 1990)
NAKH900103 AA composition of mt-proteins (Nakashima et al., 1990)
NAKH900104 Normalized composition of mt-proteins (Nakashima et al., 1990)
NAKH900105 AA composition of mt-proteins from animal (Nakashima et al., 1990)
NAKH900106 Normalized composition from animal (Nakashima et al., 1990)
NAKH900107 AA composition of mt-proteins from fungi and plant (Nakashima et al., 1990)
NAKH900108 Normalized composition from fungi and plant (Nakashima et al., 1990)
NAKH900109 AA composition of membrane proteins (Nakashima et al., 1990)
NAKH900110 Normalized composition of membrane proteins (Nakashima et al., 1990)
NAKH900111 Transmembrane regions of non-mt-proteins (Nakashima et al., 1990)
NAKH900112 Transmembrane regions of mt-proteins (Nakashima et al., 1990)
NAKH900113 Ratio of average and computed composition (Nakashima et al., 1990)
NAKH920101 AA composition of CYT of single-spanning proteins (Nakashima-Nishikawa, 1992)
NAKH920102 AA composition of CYT2 of single-spanning proteins (Nakashima-Nishikawa,  1992)
NAKH920103 AA composition of EXT of single-spanning proteins (Nakashima-Nishikawa, 1992)
NAKH920104 AA composition of EXT2 of single-spanning proteins (Nakashima-Nishikawa,  1992)
NAKH920105 AA composition of MEM of single-spanning proteins (Nakashima-Nishikawa, 1992)
NAKH920106 AA composition of CYT of multi-spanning proteins (Nakashima-Nishikawa, 1992)
NAKH920107 AA composition of EXT of multi-spanning proteins (Nakashima-Nishikawa, 1992)
NAKH920108 AA composition of MEM of multi-spanning proteins (Nakashima-Nishikawa, 1992)
NISK800101 8 A contact number (Nishikawa-Ooi, 1980)
NISK860101 14 A contact number (Nishikawa-Ooi, 1986)
NOZY710101 Transfer energy, organic solvent/water (Nozaki-Tanford, 1971)
OOBM770101 Average non-bonded energy per atom (Oobatake-Ooi, 1977)
OOBM770102 Short and medium range non-bonded energy per atom (Oobatake-Ooi, 1977)
OOBM770103 Long range non-bonded energy per atom (Oobatake-Ooi, 1977)
OOBM770104 Average non-bonded energy per residue (Oobatake-Ooi, 1977)
OOBM770105 Short and medium range non-bonded energy per residue (Oobatake-Ooi, 1977)
OOBM850101 Optimized beta-structure-coil equilibrium constant (Oobatake et al., 1985)
OOBM850102 Optimized propensity to form reverse turn (Oobatake et al., 1985)
OOBM850103 Optimized transfer energy parameter (Oobatake et al., 1985)
OOBM850104 Optimized average non-bonded energy per atom (Oobatake et al., 1985)
OOBM850105 Optimized side chain interaction parameter (Oobatake et al., 1985)
PALJ810101 Normalized frequency of alpha-helix from LG (Palau et al., 1981)
PALJ810102 Normalized frequency of alpha-helix from CF (Palau et al., 1981)
PALJ810103 Normalized frequency of beta-sheet from LG (Palau et al., 1981)
PALJ810104 Normalized frequency of beta-sheet from CF (Palau et al., 1981)
PALJ810105 Normalized frequency of turn from LG (Palau et al., 1981)
PALJ810106 Normalized frequency of turn from CF (Palau et al., 1981)
PALJ810107 Normalized frequency of alpha-helix in all-alpha class (Palau et al., 1981)
PALJ810108 Normalized frequency of alpha-helix in alpha+beta class (Palau et al., 1981)
PALJ810109 Normalized frequency of alpha-helix in alpha/beta class (Palau et al., 1981)
PALJ810110 Normalized frequency of beta-sheet in all-beta class (Palau et al., 1981)
PALJ810111 Normalized frequency of beta-sheet in alpha+beta class (Palau et al., 1981)
PALJ810112 Normalized frequency of beta-sheet in alpha/beta class (Palau et al., 1981)
PALJ810113 Normalized frequency of turn in all-alpha class (Palau et al., 1981)
PALJ810114 Normalized frequency of turn in all-beta class (Palau et al., 1981)
PALJ810115 Normalized frequency of turn in alpha+beta class (Palau et al., 1981)
PALJ810116 Normalized frequency of turn in alpha/beta class (Palau et al., 1981)
PARJ860101 HPLC parameter (Parker et al., 1986)
PLIV810101 Partition coefficient (Pliska et al., 1981)
PONP800101 Surrounding hydrophobicity in folded form (Ponnuswamy et al., 1980)
PONP800102 Average gain in surrounding hydrophobicity (Ponnuswamy et al., 1980)
PONP800103 Average gain ratio in surrounding hydrophobicity (Ponnuswamy et al., 1980)
PONP800104 Surrounding hydrophobicity in alpha-helix (Ponnuswamy et al., 1980)
PONP800105 Surrounding hydrophobicity in beta-sheet (Ponnuswamy et al., 1980)
PONP800106 Surrounding hydrophobicity in turn (Ponnuswamy et al., 1980)
PONP800107 Accessibility reduction ratio (Ponnuswamy et al., 1980)
PONP800108 Average number of surrounding residues (Ponnuswamy et al., 1980)
PRAM820101 Intercept in regression analysis (Prabhakaran-Ponnuswamy, 1982)
PRAM820102 Slope in regression analysis x 1.0E1 (Prabhakaran-Ponnuswamy, 1982)
PRAM820103 Correlation coefficient in regression analysis (Prabhakaran-Ponnuswamy, 1982)
PRAM900101 Hydrophobicity (Prabhakaran, 1990)
PRAM900102 Relative frequency in alpha-helix (Prabhakaran, 1990)
PRAM900103 Relative frequency in beta-sheet (Prabhakaran, 1990)
PRAM900104 Relative frequency in reverse-turn (Prabhakaran, 1990)
PTIO830101 Helix-coil equilibrium constant (Ptitsyn-Finkelstein, 1983)
PTIO830102 Beta-coil equilibrium constant (Ptitsyn-Finkelstein, 1983)
QIAN880101 Weights for alpha-helix at the window position of -6 (Qian-Sejnowski, 1988)
QIAN880102 Weights for alpha-helix at the window position of -5 (Qian-Sejnowski, 1988)
QIAN880103 Weights for alpha-helix at the window position of -4 (Qian-Sejnowski, 1988)
QIAN880104 Weights for alpha-helix at the window position of -3 (Qian-Sejnowski, 1988)
QIAN880105 Weights for alpha-helix at the window position of -2 (Qian-Sejnowski, 1988)
QIAN880106 Weights for alpha-helix at the window position of -1 (Qian-Sejnowski, 1988)
QIAN880107 Weights for alpha-helix at the window position of 0 (Qian-Sejnowski, 1988)
QIAN880108 Weights for alpha-helix at the window position of 1 (Qian-Sejnowski, 1988)
QIAN880109 Weights for alpha-helix at the window position of 2 (Qian-Sejnowski, 1988)
QIAN880110 Weights for alpha-helix at the window position of 3 (Qian-Sejnowski, 1988)
QIAN880111 Weights for alpha-helix at the window position of 4 (Qian-Sejnowski, 1988)
QIAN880112 Weights for alpha-helix at the window position of 5 (Qian-Sejnowski, 1988)
QIAN880113 Weights for alpha-helix at the window position of 6 (Qian-Sejnowski, 1988)
QIAN880114 Weights for beta-sheet at the window position of -6 (Qian-Sejnowski, 1988)
QIAN880115 Weights for beta-sheet at the window position of -5 (Qian-Sejnowski, 1988)
QIAN880116 Weights for beta-sheet at the window position of -4 (Qian-Sejnowski, 1988)
QIAN880117 Weights for beta-sheet at the window position of -3 (Qian-Sejnowski, 1988)
QIAN880118 Weights for beta-sheet at the window position of -2 (Qian-Sejnowski, 1988)
QIAN880119 Weights for beta-sheet at the window position of -1 (Qian-Sejnowski, 1988)
QIAN880120 Weights for beta-sheet at the window position of 0 (Qian-Sejnowski, 1988)
QIAN880121 Weights for beta-sheet at the window position of 1 (Qian-Sejnowski, 1988)
QIAN880122 Weights for beta-sheet at the window position of 2 (Qian-Sejnowski, 1988)
QIAN880123 Weights for beta-sheet at the window position of 3 (Qian-Sejnowski, 1988)
QIAN880124 Weights for beta-sheet at the window position of 4 (Qian-Sejnowski, 1988)
QIAN880125 Weights for beta-sheet at the window position of 5 (Qian-Sejnowski, 1988)
QIAN880126 Weights for beta-sheet at the window position of 6 (Qian-Sejnowski, 1988)
QIAN880127 Weights for coil at the window position of -6 (Qian-Sejnowski, 1988)
QIAN880128 Weights for coil at the window position of -5 (Qian-Sejnowski, 1988)
QIAN880129 Weights for coil at the window position of -4 (Qian-Sejnowski, 1988)
QIAN880130 Weights for coil at the window position of -3 (Qian-Sejnowski, 1988)
QIAN880131 Weights for coil at the window position of -2 (Qian-Sejnowski, 1988)
QIAN880132 Weights for coil at the window position of -1 (Qian-Sejnowski, 1988)
QIAN880133 Weights for coil at the window position of 0 (Qian-Sejnowski, 1988)
QIAN880134 Weights for coil at the window position of 1 (Qian-Sejnowski, 1988)
QIAN880135 Weights for coil at the window position of 2 (Qian-Sejnowski, 1988)
QIAN880136 Weights for coil at the window position of 3 (Qian-Sejnowski, 1988)
QIAN880137 Weights for coil at the window position of 4 (Qian-Sejnowski, 1988)
QIAN880138 Weights for coil at the window position of 5 (Qian-Sejnowski, 1988)
QIAN880139 Weights for coil at the window position of 6 (Qian-Sejnowski, 1988)
RACS770101 Average reduced distance for C-alpha (Rackovsky-Scheraga, 1977)
RACS770102 Average reduced distance for side chain (Rackovsky-Scheraga, 1977)
RACS770103 Side chain orientational preference (Rackovsky-Scheraga, 1977)
RACS820101 Average relative fractional occurrence in A0(i) (Rackovsky-Scheraga, 1982)
RACS820102 Average relative fractional occurrence in AR(i) (Rackovsky-Scheraga, 1982)
RACS820103 Average relative fractional occurrence in AL(i) (Rackovsky-Scheraga, 1982)
RACS820104 Average relative fractional occurrence in EL(i) (Rackovsky-Scheraga, 1982)
RACS820105 Average relative fractional occurrence in E0(i) (Rackovsky-Scheraga, 1982)
RACS820106 Average relative fractional occurrence in ER(i) (Rackovsky-Scheraga, 1982)
RACS820107 Average relative fractional occurrence in A0(i-1) (Rackovsky-Scheraga, 1982)
RACS820108 Average relative fractional occurrence in AR(i-1) (Rackovsky-Scheraga, 1982)
RACS820109 Average relative fractional occurrence in AL(i-1) (Rackovsky-Scheraga, 1982)
RACS820110 Average relative fractional occurrence in EL(i-1) (Rackovsky-Scheraga, 1982)
RACS820111 Average relative fractional occurrence in E0(i-1) (Rackovsky-Scheraga, 1982)
RACS820112 Average relative fractional occurrence in ER(i-1) (Rackovsky-Scheraga, 1982)
RACS820113 Value of theta(i) (Rackovsky-Scheraga, 1982)
RACS820114 Value of theta(i-1) (Rackovsky-Scheraga, 1982)
RADA880101 Transfer free energy from chx to wat (Radzicka-Wolfenden, 1988)
RADA880102 Transfer free energy from oct to wat (Radzicka-Wolfenden, 1988)
RADA880103 Transfer free energy from vap to chx (Radzicka-Wolfenden, 1988)
RADA880104 Transfer free energy from chx to oct (Radzicka-Wolfenden, 1988)
RADA880105 Transfer free energy from vap to oct (Radzicka-Wolfenden, 1988)
RADA880106 Accessible surface area (Radzicka-Wolfenden, 1988)
RADA880107 Energy transfer from out to in(95%buried) (Radzicka-Wolfenden, 1988)
RADA880108 Mean polarity (Radzicka-Wolfenden, 1988)
RICJ880101 Relative preference value at N" (Richardson-Richardson, 1988)
RICJ880102 Relative preference value at N' (Richardson-Richardson, 1988)
RICJ880103 Relative preference value at N-cap (Richardson-Richardson, 1988)
RICJ880104 Relative preference value at N1 (Richardson-Richardson, 1988)
RICJ880105 Relative preference value at N2 (Richardson-Richardson, 1988)
RICJ880106 Relative preference value at N3 (Richardson-Richardson, 1988)
RICJ880107 Relative preference value at N4 (Richardson-Richardson, 1988)
RICJ880108 Relative preference value at N5 (Richardson-Richardson, 1988)
RICJ880109 Relative preference value at Mid (Richardson-Richardson, 1988)
RICJ880110 Relative preference value at C5 (Richardson-Richardson, 1988)
RICJ880111 Relative preference value at C4 (Richardson-Richardson, 1988)
RICJ880112 Relative preference value at C3 (Richardson-Richardson, 1988)
RICJ880113 Relative preference value at C2 (Richardson-Richardson, 1988)
RICJ880114 Relative preference value at C1 (Richardson-Richardson, 1988)
RICJ880115 Relative preference value at C-cap (Richardson-Richardson, 1988)
RICJ880116 Relative preference value at C' (Richardson-Richardson, 1988)
RICJ880117 Relative preference value at C" (Richardson-Richardson, 1988)
ROBB760101 Information measure for alpha-helix (Robson-Suzuki, 1976)
ROBB760102 Information measure for N-terminal helix (Robson-Suzuki, 1976)
ROBB760103 Information measure for middle helix (Robson-Suzuki, 1976)
ROBB760104 Information measure for C-terminal helix (Robson-Suzuki, 1976)
ROBB760105 Information measure for extended (Robson-Suzuki, 1976)
ROBB760106 Information measure for pleated-sheet (Robson-Suzuki, 1976)
ROBB760107 Information measure for extended without H-bond (Robson-Suzuki, 1976)
ROBB760108 Information measure for turn (Robson-Suzuki, 1976)
ROBB760109 Information measure for N-terminal turn (Robson-Suzuki, 1976)
ROBB760110 Information measure for middle turn (Robson-Suzuki, 1976)
ROBB760111 Information measure for C-terminal turn (Robson-Suzuki, 1976)
ROBB760112 Information measure for coil (Robson-Suzuki, 1976)
ROBB760113 Information measure for loop (Robson-Suzuki, 1976)
ROBB790101 Hydration free energy (Robson-Osguthorpe, 1979)
ROSG850101 Mean area buried on transfer (Rose et al., 1985)
ROSG850102 Mean fractional area loss (Rose et al., 1985)
ROSM880101 Side chain hydropathy, uncorrected for solvation (Roseman, 1988)
ROSM880102 Side chain hydropathy, corrected for solvation (Roseman, 1988)
ROSM880103 Loss of Side chain hydropathy by helix formation (Roseman, 1988)
SIMZ760101 Transfer free energy (Simon, 1976), Cited by Charton-Charton (1982)
SNEP660101 Principal component I (Sneath, 1966)
SNEP660102 Principal component II (Sneath, 1966)
SNEP660103 Principal component III (Sneath, 1966)
SNEP660104 Principal component IV (Sneath, 1966)
SUEM840101 Zimm-Bragg parameter s at 20 C (Sueki et al., 1984)
SUEM840102 Zimm-Bragg parameter sigma x 1.0E4 (Sueki et al., 1984)
SWER830101 Optimal matching hydrophobicity (Sweet-Eisenberg, 1983)
TANS770101 Normalized frequency of alpha-helix (Tanaka-Scheraga, 1977)
TANS770102 Normalized frequency of isolated helix (Tanaka-Scheraga, 1977)
TANS770103 Normalized frequency of extended structure (Tanaka-Scheraga, 1977)
TANS770104 Normalized frequency of chain reversal R (Tanaka-Scheraga, 1977)
TANS770105 Normalized frequency of chain reversal S (Tanaka-Scheraga, 1977)
TANS770106 Normalized frequency of chain reversal D (Tanaka-Scheraga, 1977)
TANS770107 Normalized frequency of left-handed helix (Tanaka-Scheraga, 1977)
TANS770108 Normalized frequency of zeta R (Tanaka-Scheraga, 1977)
TANS770109 Normalized frequency of coil (Tanaka-Scheraga, 1977)
TANS770110 Normalized frequency of chain reversal (Tanaka-Scheraga, 1977)
VASM830101 Relative population of conformational state A (Vasquez et al., 1983)
VASM830102 Relative population of conformational state C (Vasquez et al., 1983)
VASM830103 Relative population of conformational state E (Vasquez et al., 1983)
VELV850101 Electron-ion interaction potential (Veljkovic et al., 1985)
VENT840101 Bitterness (Venanzi, 1984)
VHEG790101 Transfer free energy to lipophilic phase (von Heijne-Blomberg, 1979)
WARP780101 Average interactions per side chain atom (Warme-Morgan, 1978)
WEBA780101 RF value in high salt chromatography (Weber-Lacey, 1978)
WERD780101 Propensity to be buried inside (Wertz-Scheraga, 1978)
WERD780102 Free energy change of epsilon(i) to epsilon(ex) (Wertz-Scheraga, 1978)
WERD780103 Free energy change of alpha(Ri) to alpha(Rh) (Wertz-Scheraga, 1978)
WERD780104 Free energy change of epsilon(i) to alpha(Rh) (Wertz-Scheraga, 1978)
WOEC730101 Polar requirement (Woese, 1973)
WOLR810101 Hydration potential (Wolfenden et al., 1981)
WOLS870101 Principal property value z1 (Wold et al., 1987)
WOLS870102 Principal property value z2 (Wold et al., 1987)
WOLS870103 Principal property value z3 (Wold et al., 1987)
YUTK870101 Unfolding Gibbs energy in water, pH7.0 (Yutani et al., 1987)
YUTK870102 Unfolding Gibbs energy in water, pH9.0 (Yutani et al., 1987)
YUTK870103 Activation Gibbs energy of unfolding, pH7.0 (Yutani et al., 1987)
YUTK870104 Activation Gibbs energy of unfolding, pH9.0 (Yutani et al., 1987)
ZASB820101 Dependence of partition coefficient on ionic strength (Zaslavsky et al.,  1982)
ZIMJ680101 Hydrophobicity (Zimmerman et al., 1968)
ZIMJ680102 Bulkiness (Zimmerman et al., 1968)
ZIMJ680103 Polarity (Zimmerman et al., 1968)
ZIMJ680104 Isoelectric point (Zimmerman et al., 1968)
ZIMJ680105 RF rank (Zimmerman et al., 1968)
AURR980101 Normalized positional residue frequency at helix termini N4'(Aurora-Rose,  1998)
AURR980102 Normalized positional residue frequency at helix termini N"' (Aurora-Rose,  1998)
AURR980103 Normalized positional residue frequency at helix termini N" (Aurora-Rose,  1998)
AURR980104 Normalized positional residue frequency at helix termini N'(Aurora-Rose,  1998)
AURR980105 Normalized positional residue frequency at helix termini Nc (Aurora-Rose,  1998)
AURR980106 Normalized positional residue frequency at helix termini N1 (Aurora-Rose,  1998)
AURR980107 Normalized positional residue frequency at helix termini N2 (Aurora-Rose,  1998)
AURR980108 Normalized positional residue frequency at helix termini N3 (Aurora-Rose,  1998)
AURR980109 Normalized positional residue frequency at helix termini N4 (Aurora-Rose,  1998)
AURR980110 Normalized positional residue frequency at helix termini N5 (Aurora-Rose,  1998)
AURR980111 Normalized positional residue frequency at helix termini C5 (Aurora-Rose,  1998)
AURR980112 Normalized positional residue frequency at helix termini C4 (Aurora-Rose,  1998)
AURR980113 Normalized positional residue frequency at helix termini C3 (Aurora-Rose,  1998)
AURR980114 Normalized positional residue frequency at helix termini C2 (Aurora-Rose,  1998)
AURR980115 Normalized positional residue frequency at helix termini C1 (Aurora-Rose,  1998)
AURR980116 Normalized positional residue frequency at helix termini Cc (Aurora-Rose,  1998)
AURR980117 Normalized positional residue frequency at helix termini C' (Aurora-Rose,  1998)
AURR980118 Normalized positional residue frequency at helix termini C" (Aurora-Rose,  1998)
AURR980119 Normalized positional residue frequency at helix termini C"' (Aurora-Rose,  1998)
AURR980120 Normalized positional residue frequency at helix termini C4' (Aurora-Rose,  1998)
ONEK900101 Delta G values for the peptides extrapolated to 0 M urea (O'Neil-DeGrado,  1990)
ONEK900102 Helix formation parameters (delta delta G) (O'Neil-DeGrado, 1990)
VINM940101 Normalized flexibility parameters (B-values), average (Vihinen et al., 1994)
VINM940102 Normalized flexibility parameters (B-values) for each residue surrounded by  none rigid neighbours (Vihinen et al., 1994)
VINM940103 Normalized flexibility parameters (B-values) for each residue surrounded by  one rigid neighbours (Vihinen et al., 1994)
VINM940104 Normalized flexibility parameters (B-values) for each residue surrounded by  two rigid neighbours (Vihinen et al., 1994)
MUNV940101 Free energy in alpha-helical conformation (Munoz-Serrano, 1994)
MUNV940102 Free energy in alpha-helical region (Munoz-Serrano, 1994)
MUNV940103 Free energy in beta-strand conformation (Munoz-Serrano, 1994)
MUNV940104 Free energy in beta-strand region (Munoz-Serrano, 1994)
MUNV940105 Free energy in beta-strand region (Munoz-Serrano, 1994)
WIMW960101 Free energies of transfer of AcWl-X-LL peptides from bilayer interface to  water (Wimley-White, 1996)
KIMC930101 Thermodynamic beta sheet propensity (Kim-Berg, 1993)
MONM990101 Turn propensity scale for transmembrane helices (Monne et al., 1999)
BLAM930101 Alpha helix propensity of position 44 in T4 lysozyme (Blaber et al., 1993)
PARS000101 p-Values of mesophilic proteins based on the distributions of B values  (Parthasarathy-Murthy, 2000)
PARS000102 p-Values of thermophilic proteins based on the distributions of B values  (Parthasarathy-Murthy, 2000)
KUMS000101 Distribution of amino acid residues in the 18 non-redundant families of  thermophilic proteins (Kumar et al., 2000)
KUMS000102 Distribution of amino acid residues in the 18 non-redundant families of  mesophilic proteins (Kumar et al., 2000)
KUMS000103 Distribution of amino acid residues in the alpha-helices in thermophilic  proteins (Kumar et al., 2000)
KUMS000104 Distribution of amino acid residues in the alpha-helices in mesophilic  proteins (Kumar et al., 2000)
TAKK010101 Side-chain contribution to protein stability (kJ/mol) (Takano-Yutani, 2001)
FODM020101 Propensity of amino acids within pi-helices (Fodje-Al-Karadaghi, 2002)
NADH010101 Hydropathy scale based on self-information values in the two-state model (5%  accessibility) (Naderi-Manesh et al., 2001)
NADH010102 Hydropathy scale based on self-information values in the two-state model (9%  accessibility) (Naderi-Manesh et al., 2001)
NADH010103 Hydropathy scale based on self-information values in the two-state model (16%  accessibility) (Naderi-Manesh et al., 2001)
NADH010104 Hydropathy scale based on self-information values in the two-state model (20%  accessibility) (Naderi-Manesh et al., 2001)
NADH010105 Hydropathy scale based on self-information values in the two-state model (25%  accessibility) (Naderi-Manesh et al., 2001)
NADH010106 Hydropathy scale based on self-information values in the two-state model (36%  accessibility) (Naderi-Manesh et al., 2001)
NADH010107 Hydropathy scale based on self-information values in the two-state model (50%  accessibility) (Naderi-Manesh et al., 2001)
MONM990201 Averaged turn propensities in a transmembrane helix (Monne et al., 1999)
KOEP990101 Alpha-helix propensity derived from designed sequences (Koehl-Levitt, 1999)
KOEP990102 Beta-sheet propensity derived from designed sequences (Koehl-Levitt, 1999)
CEDJ970101 Composition of amino acids in extracellular proteins (percent) (Cedano et  al., 1997)
CEDJ970102 Composition of amino acids in anchored proteins (percent) (Cedano et al.,  1997)
CEDJ970103 Composition of amino acids in membrane proteins (percent) (Cedano et al.,  1997)
CEDJ970104 Composition of amino acids in intracellular proteins (percent) (Cedano et  al., 1997)
CEDJ970105 Composition of amino acids in nuclear proteins (percent) (Cedano et al.,  1997)
FUKS010101 Surface composition of amino acids in intracellular proteins of thermophiles  (percent) (Fukuchi-Nishikawa, 2001)
FUKS010102 Surface composition of amino acids in intracellular proteins of mesophiles  (percent) (Fukuchi-Nishikawa, 2001)
FUKS010103 Surface composition of amino acids in extracellular proteins of mesophiles  (percent) (Fukuchi-Nishikawa, 2001)
FUKS010104 Surface composition of amino acids in nuclear proteins (percent)  (Fukuchi-Nishikawa, 2001)
FUKS010105 Interior composition of amino acids in intracellular proteins of thermophiles  (percent) (Fukuchi-Nishikawa, 2001)
FUKS010106 Interior composition of amino acids in intracellular proteins of mesophiles  (percent) (Fukuchi-Nishikawa, 2001)
FUKS010107 Interior composition of amino acids in extracellular proteins of mesophiles  (percent) (Fukuchi-Nishikawa, 2001)
FUKS010108 Interior composition of amino acids in nuclear proteins (percent)  (Fukuchi-Nishikawa, 2001)
FUKS010109 Entire chain composition of amino acids in intracellular proteins of  thermophiles (percent) (Fukuchi-Nishikawa, 2001)
FUKS010110 Entire chain composition of amino acids in intracellular proteins of  mesophiles (percent) (Fukuchi-Nishikawa, 2001)
FUKS010111 Entire chain composition of amino acids in extracellular proteins of  mesophiles (percent) (Fukuchi-Nishikawa, 2001)
FUKS010112 Entire chain compositino of amino acids in nuclear proteins (percent)  (Fukuchi-Nishikawa, 2001)
AVBF000101 Screening coefficients gamma, local (Avbelj, 2000)
AVBF000102 Screening coefficients gamma, non-local (Avbelj, 2000)
AVBF000103 Slopes tripeptide, FDPB VFF neutral (Avbelj, 2000)
AVBF000104 Slopes tripeptides, LD VFF neutral (Avbelj, 2000)
AVBF000105 Slopes tripeptide, FDPB VFF noside (Avbelj, 2000)
AVBF000106 Slopes tripeptide FDPB VFF all (Avbelj, 2000)
AVBF000107 Slopes tripeptide FDPB PARSE neutral (Avbelj, 2000)
AVBF000108 Slopes dekapeptide, FDPB VFF neutral (Avbelj, 2000)
AVBF000109 Slopes proteins, FDPB VFF neutral (Avbelj, 2000)
YANJ020101 Side-chain conformation by gaussian evolutionary method (Yang et al., 2002)
MITS020101 Amphiphilicity index (Mitaku et al., 2002)
TSAJ990101 Volumes including the crystallographic waters using the ProtOr (Tsai et al.,  1999)
TSAJ990102 Volumes not including the crystallographic waters using the ProtOr (Tsai et  al., 1999)
COSI940101 Electron-ion interaction potential values (Cosic, 1994)
PONP930101 Hydrophobicity scales (Ponnuswamy, 1993)
WILM950101 Hydrophobicity coefficient in RP-HPLC, C18 with 0.1%TFA/MeCN/H2O (Wilce et  al. 1995)
WILM950102 Hydrophobicity coefficient in RP-HPLC, C8 with 0.1%TFA/MeCN/H2O (Wilce et al.  1995)
WILM950103 Hydrophobicity coefficient in RP-HPLC, C4 with 0.1%TFA/MeCN/H2O (Wilce et al.  1995)
WILM950104 Hydrophobicity coefficient in RP-HPLC, C18 with 0.1%TFA/2-PrOH/MeCN/H2O  (Wilce et al. 1995)
KUHL950101 Hydrophilicity scale (Kuhn et al., 1995)
GUOD860101 Retention coefficient at pH 2 (Guo et al., 1986)
JURD980101 Modified Kyte-Doolittle hydrophobicity scale (Juretic et al., 1998)
BASU050101 Interactivity scale obtained from the contact matrix (Bastolla et al., 2005)
BASU050102 Interactivity scale obtained by maximizing the mean of correlation  coefficient over single-domain globular proteins (Bastolla et al., 2005)
BASU050103 Interactivity scale obtained by maximizing the mean of correlation  coefficient over pairs of sequences sharing the TIM barrel fold (Bastolla et  al., 2005)
SUYM030101 Linker propensity index (Suyama-Ohara, 2003)
PUNT030101 Knowledge-based membrane-propensity scale from 1D_Helix in MPtopo databases  (Punta-Maritan, 2003)
PUNT030102 Knowledge-based membrane-propensity scale from 3D_Helix in MPtopo databases  (Punta-Maritan, 2003)
GEOR030101 Linker propensity from all dataset (George-Heringa, 2003)
GEOR030102 Linker propensity from 1-linker dataset (George-Heringa, 2003)
GEOR030103 Linker propensity from 2-linker dataset (George-Heringa, 2003)
GEOR030104 Linker propensity from 3-linker dataset (George-Heringa, 2003)
GEOR030105 Linker propensity from small dataset (linker length is less than six  residues) (George-Heringa, 2003)
GEOR030106 Linker propensity from medium dataset (linker length is between six and 14  residues) (George-Heringa, 2003)
GEOR030107 Linker propensity from long dataset (linker length is greater than 14  residues) (George-Heringa, 2003)
GEOR030108 Linker propensity from helical (annotated by DSSP) dataset (George-Heringa,  2003)
GEOR030109 Linker propensity from non-helical (annotated by DSSP) dataset  (George-Heringa, 2003)
ZHOH040101 The stability scale from the knowledge-based atom-atom potential (Zhou-Zhou,  2004)
ZHOH040102 The relative stability scale extracted from mutation experiments (Zhou-Zhou,  2004)
ZHOH040103 Buriability (Zhou-Zhou, 2004)
BAEK050101 Linker index (Bae et al., 2005)
HARY940101 Mean volumes of residues buried in protein interiors (Harpaz et al., 1994)
PONJ960101 Average volumes of residues (Pontius et al., 1996)
DIGM050101 Hydrostatic pressure asymmetry index, PAI (Di Giulio, 2005)
WOLR790101 Hydrophobicity index (Wolfenden et al., 1979)
OLSK800101 Average internal preferences (Olsen, 1980)
KIDA850101 Hydrophobicity-related index (Kidera et al., 1985)
GUYH850102 Apparent partition energies calculated from Wertz-Scheraga index (Guy, 1985)
GUYH850103 Apparent partition energies calculated from Robson-Osguthorpe index (Guy,  1985)
GUYH850104 Apparent partition energies calculated from Janin index (Guy, 1985)
GUYH850105 Apparent partition energies calculated from Chothia index (Guy, 1985)
ROSM880104 Hydropathies of amino acid side chains, neutral form (Roseman, 1988)
ROSM880105 Hydropathies of amino acid side chains, pi-values in pH 7.0 (Roseman, 1988)
JACR890101 Weights from the IFH scale (Jacobs-White, 1989)
COWR900101 Hydrophobicity index, 3.0 pH (Cowan-Whittaker, 1990)
BLAS910101 Scaled side chain hydrophobicity values (Black-Mould, 1991)
CASG920101 Hydrophobicity scale from native protein structures (Casari-Sippl, 1992)
CORJ870101 NNEIG index (Cornette et al., 1987)
CORJ870102 SWEIG index (Cornette et al., 1987)
CORJ870103 PRIFT index (Cornette et al., 1987)
CORJ870104 PRILS index (Cornette et al., 1987)
CORJ870105 ALTFT index (Cornette et al., 1987)
CORJ870106 ALTLS index (Cornette et al., 1987)
CORJ870107 TOTFT index (Cornette et al., 1987)
CORJ870108 TOTLS index (Cornette et al., 1987)
MIYS990101 Relative partition energies derived by the Bethe approximation  (Miyazawa-Jernigan, 1999)
MIYS990102 Optimized relative partition energies - method A (Miyazawa-Jernigan, 1999)
MIYS990103 Optimized relative partition energies - method B (Miyazawa-Jernigan, 1999)
MIYS990104 Optimized relative partition energies - method C (Miyazawa-Jernigan, 1999)
MIYS990105 Optimized relative partition energies - method D (Miyazawa-Jernigan, 1999)
ENGD860101 Hydrophobicity index (Engelman et al., 1986)
FASG890101 Hydrophobicity index (Fasman, 1989)
